# Supplementary material
Source: PubMed Central journal article supplement (PMC3627225)
Supplement: NIHMS453870-supplement-1_si_001.pdf [file NIHMS453870-supplement-1_si_001.pdf]

## Supporting Information

### Structure-based discovery of pyrazolobenzothiazine derivatives as inhibitors of hepatitis C virus replication

*Maria Letizia Barreca,<sup>\*,†</sup> Giuseppe Manfroni,<sup>\*,†</sup> Pieter Leyssen,<sup>‡</sup> Johan Winquist,<sup>#</sup> Neerja Kaushik-Basu,<sup>§</sup> Jan Paeshuyse,<sup>‡</sup> Ramalingam Krishnan,<sup>§</sup> Nunzio Iraci,<sup>†</sup> Stefano Sabatini,<sup>†</sup> Oriana Tabarrini,<sup>†</sup> Amartya Basu,<sup>§</sup> U. Helena Danielson,<sup>#</sup> Johan Neyts,<sup>‡</sup> and Violetta Cecchetti<sup>†</sup>*

<sup>†</sup>Dipartimento di Chimica e Tecnologia del Farmaco, Sezione di Chimica Farmaceutica II, Università degli Studi di Perugia, Via del Liceo 1, 06123 Perugia, Italy

<sup>‡</sup>Rega Institute for Medical Research, Katholieke Universiteit Leuven, B-3000 Leuven, Belgium

<sup>#</sup>Department of Chemistry – BMC, Uppsala University, Box 576, SE-751 23 Uppsala, Sweden.

<sup>§</sup>Department of Biochemistry and Molecular Biology UMDNJ-New Jersey Medical School 185 South Orange Avenue, New Jersey 07103, USA

#### Table of contents

**pK<sub>D</sub>, pIC<sub>50</sub> and calculated logP values for compounds 4a-j, 5a, and 6a.....S2**

**Plot of calculated logP versus pK<sub>D</sub>.....S2**

**Plot of calculated logP versus pIC<sub>50</sub>.....S3**

**Table S1**

Values of  $pK_D$ ,  $pIC_{50}$  and  $\log P$  calculated using the program QikProp (descriptor QPlogPo/w) for compounds **4a-j**, **5a**, and **6a**

| cpds      | $pK_D$ | $pIC_{50}$ | QPlogPo/w |
|-----------|--------|------------|-----------|
| <b>4a</b> | 4.12   | 4.68       | 2.30      |
| <b>4b</b> | 3.79   | 4.85       | 2.18      |
| <b>4c</b> | -      | 5.41       | 2.34      |
| <b>4d</b> | 4.28   | 4.70       | 2.09      |
| <b>4e</b> | 4.85   | -          | 1.45      |
| <b>4f</b> | 4.46   | 4.70       | 1.61      |
| <b>4g</b> | -      | 5.11       | 1.31      |
| <b>4h</b> | 3.79   | -          | 1.27      |
| <b>4i</b> | 3.97   | 4.40       | 1.32      |
| <b>4j</b> | 3.78   | 4.74       | 1.26      |
| <b>5a</b> | 3.79   | -          | 2.81      |
| <b>6a</b> | 4.20   | -          | 2.33      |

Plots of QPlogPo/w *versus*  $pK_D$  (Figure S1) and  $pIC_{50}$  (Figure S2). Diagonal lines represent area of identical LLE values.

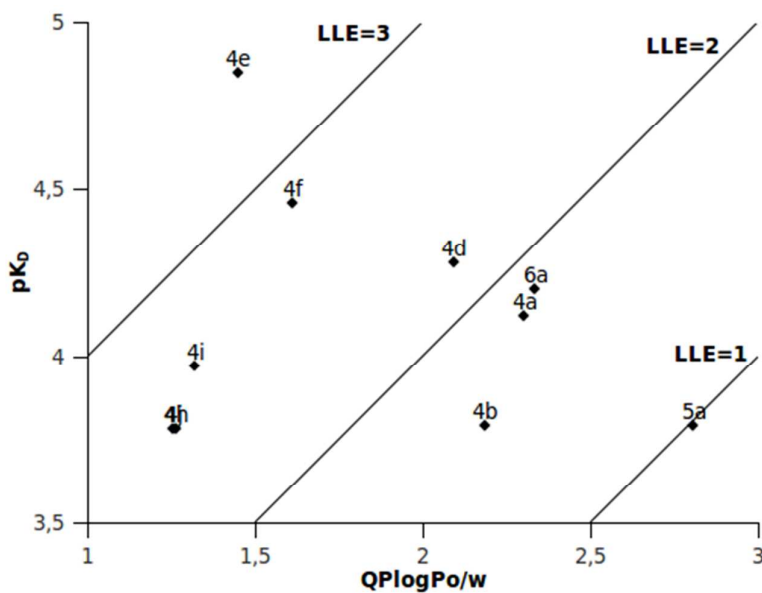**Figure S1.** Calculated  $\log P$  vs  $pK_D$ .

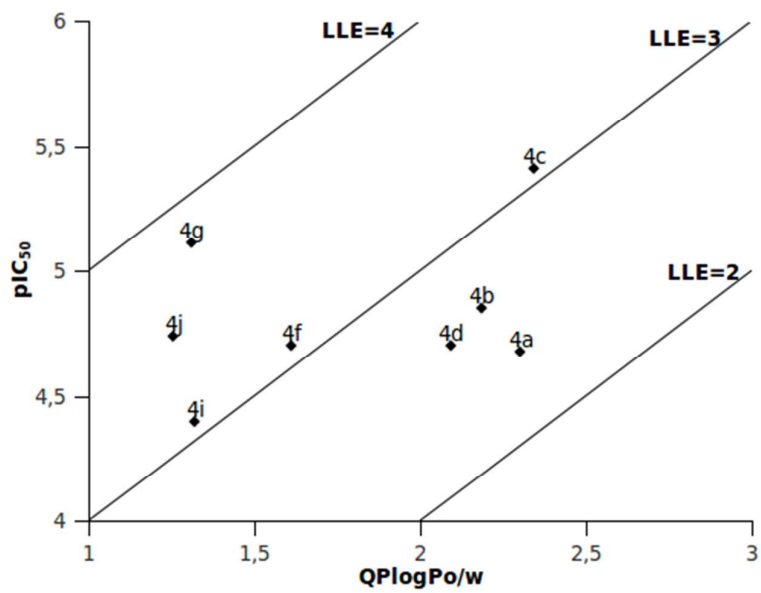

**Figure S2.** Calculated logP vs pIC<sub>50</sub>.
